# Supplementary material
Source: publisher figshare collection journal article supplement (https://acs.figshare.com/ndownloader/files/5305129)
Supplement: Supplementary file 1 [file 5305129]

**Supporting Information for:**

**The Impact of Short-range Forces on Defect Production from High-energy Collisions**

R. E. Stoller<sup>1</sup>, A. Tamm<sup>2,3</sup>, L. K. Beland<sup>1</sup>, G. D. Samolyuk<sup>1</sup>, G. M. Stocks<sup>1</sup>, A. Caro<sup>3</sup>, L. V. Slipchenko<sup>4</sup>, Yu. N. Osetsky<sup>1</sup>, A. Aabloo<sup>2</sup>, M. Klintonberg<sup>5</sup>, and Y. Wang<sup>6</sup>

<sup>1</sup>Materials Science and Technology Division, Oak Ridge National Laboratory, Oak Ridge, TN 3781, USA

<sup>2</sup>IMS Lab, Institute of Technology, University of Tartu, 50411 Tartu, Estonia

<sup>3</sup>Materials Science and Technology Division, Los Alamos National Laboratory Los Alamos NM 87544, USA

<sup>4</sup>Department of Chemistry, Purdue University, West Lafayette, IN 47906

<sup>5</sup>Department of Physics and Astronomy, Uppsala University, SE-75120 Uppsala, Sweden

<sup>6</sup>Pittsburgh Supercomputer Center, Carnegie-Mellon University, Pittsburgh, PA 15213, USA

**email: [stollerre@ornl.gov](mailto:stollerre@ornl.gov)**

**Research sponsored by the Office of Basic Energy Sciences, U.S. Department of Energy, under contract DE-AC05-00OR22725 with UT-Battelle, LLC. Accordingly, the U.S. Government retains a nonexclusive, royalty-free license to publish or reproduce the published form of this contribution, or allow others to do so, for U.S. Government purposes**

### S1. Equation of state and dimer energy in the EAM formalism

The energy of a single element crystal lattice per atom can be written within the EAM formalism as:

$$E(a) = \frac{1}{2} \sum_{i \in N_n} N_i \varphi(\alpha_i a_o) + F(\bar{\rho}) , \quad (S1)$$

where

$$\bar{\rho} = \sum_{i \in N_n} N_i \rho(\alpha_i a_o)$$

is the local density at a site  $i$  and sum goes over all the neighboring shells.  $N_i$  is the number of atoms in the  $i$ -th shell and the term  $\alpha_i a_o$  is the distance between a given site and atoms in the specified shell. The symbol  $a_o$  is the lattice parameter. The number of atoms and the distances associated with the first six neighbor shells are listed in Table S1.

| Table S1: Number of atoms and distances from origin for first six nearest neighbor shells for an fcc lattice |              |     |              |              |              |              |
|--------------------------------------------------------------------------------------------------------------|--------------|-----|--------------|--------------|--------------|--------------|
| Shell                                                                                                        | 1            | 2   | 3            | 4            | 5            | 6            |
| $N_i$                                                                                                        | 12           | 6   | 24           | 12           | 24           | 8            |
| $\alpha_i$                                                                                                   | $\sqrt{0.5}$ | 1.0 | $\sqrt{1.5}$ | $\sqrt{2.0}$ | $\sqrt{2.5}$ | $\sqrt{3.0}$ |

The error introduced by using a finite number of neighbor shells can be reduced by rewriting Eq. (S1) in terms of differences with respect to the equilibrium energy,  $E_0$ :

$$E(a) = E_0 + \frac{1}{2} \sum_{i \in N_n} N_i (\varphi(\alpha_i a) - \varphi(\alpha_i a_o)) + F(\bar{\rho}_0 + \Delta\bar{\rho}) - F(\bar{\rho}_0) \quad (S2)$$

$$\Delta\bar{\rho} = \sum_{i \in N_n} N_i (\rho(\alpha_i a) - \rho(\alpha_i a_o)) \quad (S3)$$

Similar to the case for the analytical EOS, a formula can be written for the dimer energy in the crystal lattice. The formula has the following form:

$$E(r) = E_0 + \frac{1}{2} \sum_{i \in N_n} N_i (\varphi(r_i(r)) - \varphi(r_i(r_0))) + F(\bar{\rho}_0 + \Delta\bar{\rho}) - F(\bar{\rho}_0) \quad (S4)$$

$$\Delta\bar{\rho} = \sum_{i \in N_n} N_i (\rho(r_i(r)) - \rho(r_i(r_0))) \quad (S5)$$

The term  $N_i$  is related to the number of atoms contributing, which for the case  $i = 1$  involves only the nearest neighbor. The distance function  $r_i(r)$  is shown in Table S2 for different site contributions, where the term  $r_0$  is the equilibrium separation between nearest neighbor atoms.

| Table S2: Terms contributing to sum in Eqns. (S4) and (S5) |     |                             |                              |                               |            |
|------------------------------------------------------------|-----|-----------------------------|------------------------------|-------------------------------|------------|
| Contribution                                               | 1   | 2                           | 3                            | 4                             | 5          |
| $N_i$                                                      | 1   | 4                           | 2                            | 4                             | 1          |
| $r_i(r)$                                                   | $r$ | $\sqrt{r^2 - rr_0 - r_0^2}$ | $\sqrt{r_0^2 + (r_0 - r)^2}$ | $\sqrt{3r_0^2 - 3rr_0 + r^2}$ | $2r_0 - r$ |

## S2. LAMMPS overlay method for joining ZBL to equilibrium potentials

The LAMMPS hybrid/overlay method can be used to superimpose two interatomic potentials such as joining the ZBL to an EAM potential at short atomic separation distances<sup>S1</sup>. The general form is:

$$E(\mathbf{r}) = E_{EAM}(\mathbf{r}) + E_{ZBL+S}(\mathbf{r}). \quad (S6)$$

The ZBL implementation of LAMMPS requires that the user provide the atomic number of the interacting atoms, as well as an inner cutoff ( $r_1$ ) and outer cutoff ( $r_c$ ) radius. The outer cutoff radius is the global cutoff distance for the ZBL interaction, while the inner cutoff radius is the distance where a “switching” function,  $S(r)$ , is used to smoothly join the ZBL to the equilibrium potential:

|                                                                                                     |      |
|-----------------------------------------------------------------------------------------------------|------|
| $S(r) = C \quad r < r_1$                                                                            |      |
| $S(r) = \frac{A}{3}(r - r_1)^3 + \frac{B}{4}(r - r_1)^4 + C \quad r_1 < r < r_c$                    |      |
| $A = (-3E'_{ZBL}(r_c) + (r_c - r_1)E''_{ZBL}(r_c))/(r_c - r_1)^2$                                   | (S7) |
| $B = (2E'_{ZBL}(r_c) + (r_c - r_1)E''_{ZBL}(r_c))/(r_c - r_1)^3$                                    |      |
| $C = -E_{ZBL}(r_c) + \frac{1}{2}(r_c - r_1)E'_{ZBL}(r_c) - \frac{1}{12}(r_c - r_1)^2E''_{ZBL}(r_c)$ |      |

This switching function is added to the ZBL interaction:

$$E_{ZBL+S}(r) = E_{ZBL} + S(r) \quad r < r_c. \quad (S8)$$

## References

S1. The LAMMPS overlay method is described in the on-line manual at:  
[http://lammps.sandia.gov/doc/pair\\_hybrid.html](http://lammps.sandia.gov/doc/pair_hybrid.html), [http://lammps.sandia.gov/doc/pair\\_zbl.html](http://lammps.sandia.gov/doc/pair_zbl.html),  
[http://lammps.sandia.gov/doc/pair\\_gromacs.html](http://lammps.sandia.gov/doc/pair_gromacs.html), (Accessed Dec. 15, 2015).
